# Supplementary material for: Effects of Momordica saponin extract on alleviating fat accumulation in Caenorhabditis elegans
Source: Royal Society of Chemistry journal article supplement (doi:10.1039/c9fo00254e), 2019-01-01
Supplement: c9fo00254e1.pdf [file c9fo00254e1.pdf]

1

## Supplementary Information

2

### Effects of *Momordica* saponins extract on alleviating fat

3

### accumulation in *Caenorhabditis elegans*

4

Chunxiu Lin<sup>ab</sup>, Yizi Lin<sup>ab</sup>, Yue Chen<sup>ab</sup>, Jiena Xu<sup>ab</sup>, Jun Li<sup>ab</sup>, Yong Cao<sup>ab</sup>, Zuanxian

5

Su<sup>c\*</sup>, Yunjiao Chen<sup>ab\*</sup>

6

#### 1 LC-Q-TOF-MS/MS analysis

7

MSE were qualitatively analyzed using Uplc 1290-6540B Q-TOF (Agilent

8

Technologies, Palo Alto, CA, USA). Chromatographic separation was carried out

9

using an Agilent Eclipse plus C18 column (100 × 2.1 mm, 1.8 μm) with a binary pump,

10

degasser, column oven and autosampler. The analyses employed a 40-min linear

11

gradient of acetonitrile (A) and 0.2% formic acid in ultrapure water (B), increasing

12

from 10 to 90% B, with a 5-min hold at 90 % B, and a 5-min post-run at 10% B. The

13

injection volume was 5 μL. The flow rate was set at 0.4 mL/min and oven

14

temperature was 40°C. For the online TOF-MS and TOF-MS/MS analysis,

15

experimental operation parameters were set as follows: nozzle voltage 1000 V;

16

skimmer, 65 V; gas flow, 8 L/min; gas temp, 300°C; nebulizer, 45 psi. The collision

17

energy (CE) was set at 0 eV for negative and positive ion mode. The mass scan was

18

over the range of m/z 100–1700 for both modes. Data analysis was carried out using

19

the Agilent Mass Hunter Qualitative software (version B.07.00). Accurate mass scan

20

data were mined using the find by molecular feature (FMF), find by formula (FbF),

21

find by targeted MS/MS and molecular formula generator (MFG) algorithms.

22

## 23 **2 Determination of total saponins**

24 The colorimetric method with vanillin–acetic acid system was performed for the  
25 quantification of total saponins.<sup>1</sup> Briefly, MSE was dried and reconstituted with a  
26 methanol solution at 1:1. After the solution(0.2 mL) was evaporated to dryness in a  
27 water-bath, a fresh solution of vanillin-acetic acid (5% w/v, 0.2 mL) solution was  
28 prepared and perchloric acid (0.8 mL) was added and kept at 70°C for 15 min. The  
29 solution was cooled in running water for 10 min before adding glacial acetic acid (5  
30 mL). The solution was measured at 555 nm using a UV spectrophotometer (Agilent  
31 8453, Agilent technologies, CA, USA), with a blank solution as reference.  
32 Quantification was based on the standard curve of ginsenoside Rg1 (0–160 µg), which  
33 was dissolved in methanol ( $A = 3.7293C$ ,  $R^2 = 0.9994$ ).

34 **3 Primer sequences for qRT-PCR analysis**

35 **Table S1 Primer sequences for qRT-PCR analysis**

| <b>Gene</b>   | <b>Primer</b>                |
|---------------|------------------------------|
| <i>sbp-1</i>  | CTACTCGCACCATTCTTCTCG (F)    |
|               | CCAAATCTCAACTGCTTCTGC (R)    |
| <i>nhr-49</i> | CTCCATCGAAAGATCCATGA (F)     |
|               | GGATTCTCTGCTCTCCGAGTT (R)    |
| <i>mdt-15</i> | AACATCAGCTCAGGCAAGAAA (F)    |
|               | TCTGTCCACCTGGACGAATAC (R)    |
| <i>fat-5</i>  | GGGCTACAGTTGGATGGGTAT (F)    |
|               | ATCTCTGGCCCAGTCGATAAT (R)    |
| <i>fat-6</i>  | CTTGTGCTGCTTCATTCTTCC (F)    |
|               | GAAGTTGTGACCTCCCTCTCC (R)    |
| <i>fat-7</i>  | ACCCGTGGATTCTTCTTCACT (F)    |
|               | TAACGGAATGTTCCAGCTACG (R)    |
| <i>fasn-1</i> | ACTGTCGGATCAGCTGAGAAA (F)    |
|               | GACGAGCCAAACATCTGAGAG (R)    |
| <i>pod-2</i>  | AACACCTTCGTCATCATCCTG (F)    |
|               | CCAGTGTACGGAGACTTGAGC (R)    |
| <i>acs-2</i>  | GGCTGAACAACAACGCATATT (F)    |
|               | GACTTTGATGGGAAGACCACA (R)    |
| <i>daf-2</i>  | GGATAAAGGCGAATCAAAGTGTC (F)  |
|               | CGATACACTTTCCTTGTGATAGAC (R) |
| <i>age-1</i>  | TTGTTTCGTTTCCTTGTTCACC (F)   |
|               | ATCCATTGAAGGCTTCTTCGT (R)    |
| <i>daf-16</i> | CTTCAAGCCAATGCCACTACC (F)    |
|               | GGAGATGAGTTGGATGTTGATAGC (R) |
| <i>act-1</i>  | TCCAAGAGAGGTATCCTTAC (F)     |
|               | CGGTTAGCCTTTGGATTGAG (R)     |

37 **4 Relative quantitative data using ImageJ software**

38 **Table S2 Relative quantitative data using ImageJ software**

| genotype                 | treatment | mean $\pm$ SD   | <i>p</i> -value |
|--------------------------|-----------|-----------------|-----------------|
| normal feeding N2        | CK        | 1.00 $\pm$ 0.02 | 0.000           |
|                          | MSE       | 0.79 $\pm$ 0.02 |                 |
| glucose feeding N2       | CK        | 1.28 $\pm$ 0.04 | 0.000           |
|                          | MSE       | 0.97 $\pm$ 0.00 |                 |
| high-fat N2              | CK        | 1.00 $\pm$ 0.02 | 0.004           |
|                          | MSE       | 0.91 $\pm$ 0.01 |                 |
| N2 (age pigment, day 3)  | CK        | 1.00 $\pm$ 0.04 | 0.024           |
|                          | MSE       | 0.89 $\pm$ 0.03 |                 |
| N2 (age pigment, day 7)  | CK        | 1.00 $\pm$ 0.04 | 0.039           |
|                          | MSE       | 0.93 $\pm$ 0.01 |                 |
| N2 (age pigment, day 11) | CK        | 1.00 $\pm$ 0.02 | 0.001           |
|                          | MSE       | 0.76 $\pm$ 0.03 |                 |
| N2 (body area)           | CK        | 1.00 $\pm$ 0.14 | 0.271           |
|                          | MSE       | 0.88 $\pm$ 0.04 |                 |
| SBP-1::GFP               | CK        | 1.00 $\pm$ 0.04 | 0.000           |
|                          | MSE       | 0.79 $\pm$ 0.02 |                 |
| <i>daf-2</i>             | CK        | 1.27 $\pm$ 0.03 | 0.113           |
|                          | MSE       | 1.31 $\pm$ 0.02 |                 |
| <i>age-1</i>             | CK        | 1.18 $\pm$ 0.06 | 0.365           |
|                          | MSE       | 1.14 $\pm$ 0.04 |                 |
| <i>daf-16</i>            | CK        | 0.91 $\pm$ 0.00 | 0.306           |
|                          | MSE       | 0.88 $\pm$ 0.04 |                 |
| <i>sbp-1</i>             | CK        | 0.75 $\pm$ 0.01 | 0.509           |
|                          | MSE       | 0.76 $\pm$ 0.02 |                 |
| <i>mdt-15</i>            | CK        | 0.81 $\pm$ 0.04 | 0.598           |
|                          | MSE       | 0.78 $\pm$ 0.07 |                 |
| <i>nhr-49</i>            | CK        | 0.89 $\pm$ 0.06 | 0.426           |
|                          | MSE       | 0.93 $\pm$ 0.03 |                 |
| <i>fat-5</i>             | CK        | 0.67 $\pm$ 0.01 | 0.383           |
|                          | MSE       | 0.68 $\pm$ 0.01 |                 |
| <i>fat-6</i>             | CK        | 0.57 $\pm$ 0.00 | 0.383           |
|                          | MSE       | 0.58 $\pm$ 0.01 |                 |
| <i>fat-7</i>             | CK        | 0.63 $\pm$ 0.02 | 0.630           |
|                          | MSE       | 0.64 $\pm$ 0.01 |                 |
| <i>fat-5/fat-6</i>       | CK        | 0.60 $\pm$ 0.01 | 0.136           |
|                          | MSE       | 0.58 $\pm$ 0.01 |                 |
| <i>fat-5/fat-7</i>       | CK        | 0.58 $\pm$ 0.00 | 0.148           |
|                          | MSE       | 0.59 $\pm$ 0.01 |                 |

39

## 40 5 Rrepresentative total ion chromatograms

41 **Figure S1.** Representative TIC of MSE. (A) TIC of MSE sample in positive ion mode.

42 (B) TIC of MSE sample in negative ion mode.

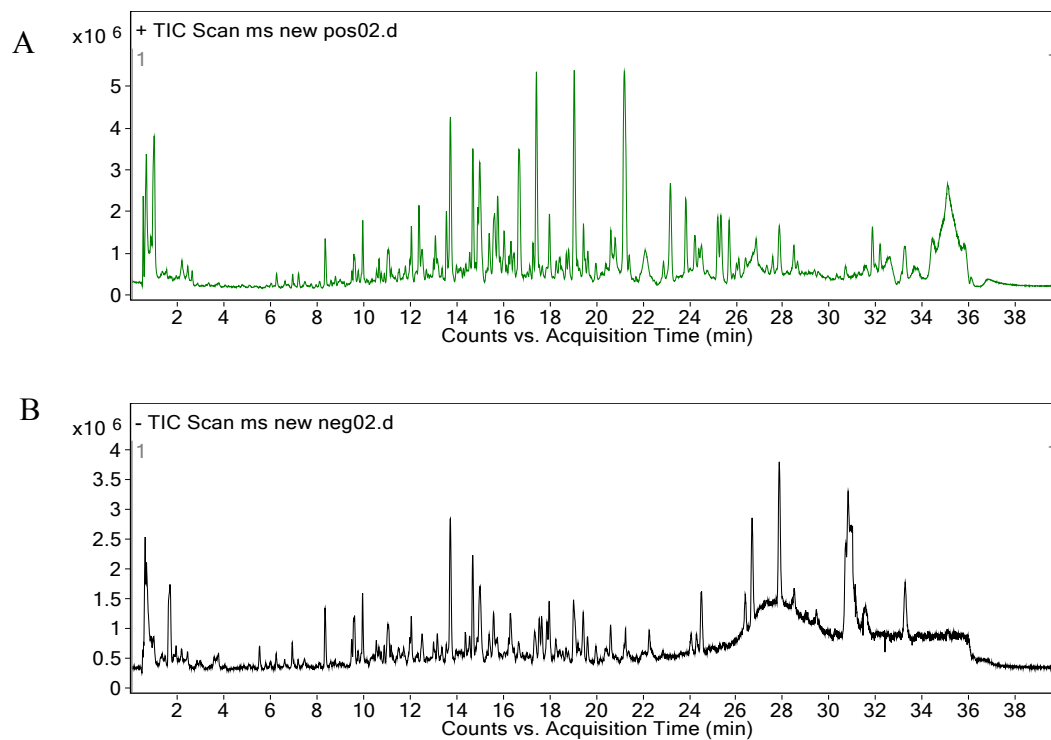

**Fig. S1**

43 **6 The process of fat accumulation assay**

44 **Figure S2.** The illustrative diagram indicating the treatment method of MSE in  
45 N2. (A) The treatment of normal feeding and glucose feeding. (B) The treatment  
46 mode of the high fat model.

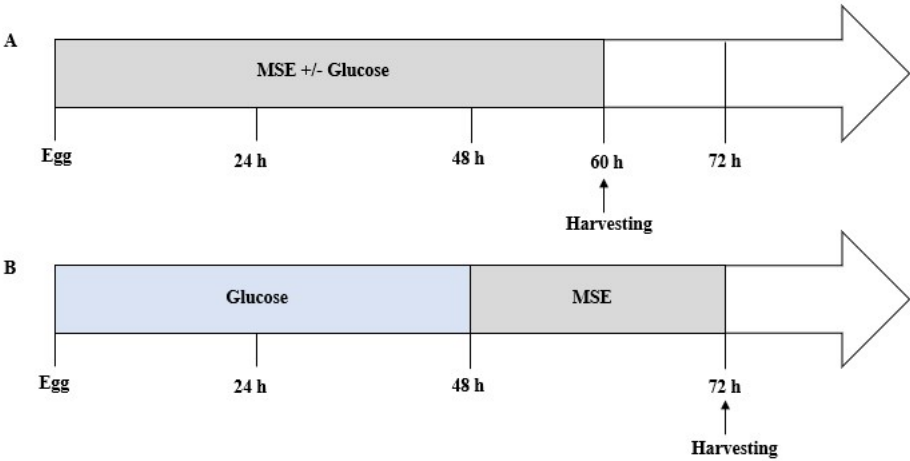

**Fig. S2**

47 **7 Construction of glucose-induced high-fat N2**

48 **Figure S3.** Construction of glucose-induced high-fat *C. elegans*. (A) Representative  
49 images of body fat after 48 hours treatment with 10 mM glucose in N2 by ORO  
50 staining. (B) Relative quantification of the lipid content using Image J software. High-  
51 glucose diet significantly increased the fat content, confirming the successful  
52 construction of high-fat *C. elegans*.

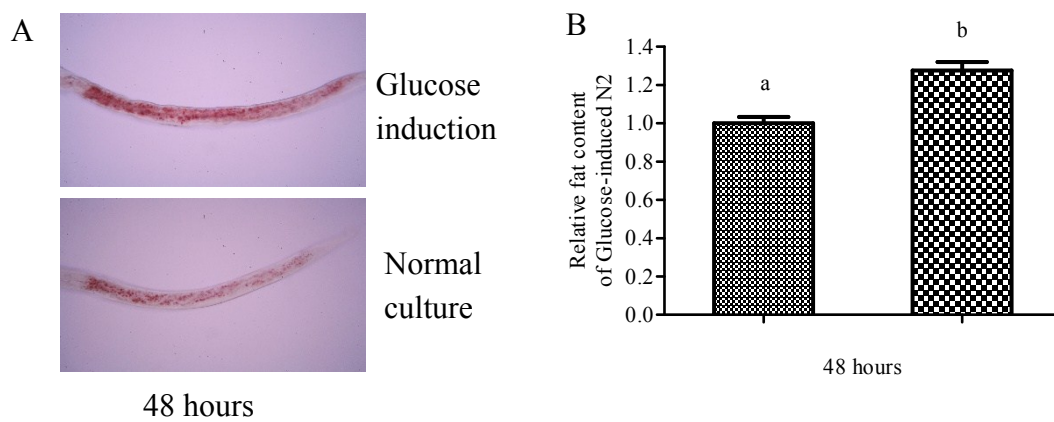

**Fig. S3**

53 **References**

- 54 1. Y. Y. Lu, Z. H. Ao, Z. M. Lu, H. Y. Xu, X. M. Zhang, W. F. Dou and Z. H.  
55 Xu,  
56 Analgesic and anti-inflammatory effects of the dry matter of culture broth of  
57 *Termitomyces albuminosus* and its extracts, *Journal of ethnopharmacology*, 2008,  
58 **120**, 432-436.
